# The resting frequency of echolocation signals changes with body temperature in the hipposiderid bat, *Hipposideros armiger*

Diana Schoeppler<sup>1,\*</sup>, Annette Denzinger<sup>1</sup> and Hans-Ulrich Schnitzler<sup>1</sup>

<sup>1</sup>Animal Physiology, Institute for Neurobiology, Faculty of Science, University of Tübingen, Germany

\*Email corresponding author: diana.schoeppler@uni-tuebingen.de

## Abstract

Doppler shift (DS) compensating bats adjust in flight the second harmonic of the constant-frequency component ( $CF_2$ ) of their echolocation signals so that the frequency of the Doppler shifted echoes returning from ahead is kept constant with high precision (0.1-0.2%) at the so-called reference frequency ( $f_{ref}$ ). This feedback adjustment is mediated by an audio-vocal control system which correlates with a maximal activation of the foveal resonance area in the cochlea. Stationary bats adjust the average  $CF_2$  with similar precision at the resting frequency ( $f_{rest}$ ), which is slightly below the  $f_{ref}$ . Over a variety of time periods (from minutes up to years) variations of the coupled  $f_{ref}$  and  $f_{rest}$  have been observed, and were attributed to age, social influences and behavioural situations in rhinolophids and hipposiderids, and to body temperature effects and flight activity in *Pteronotus parnellii*. We assume that, for all DS compensating bats, a change in body temperature has a strong effect on the activation state of the foveal resonance area in the cochlea which leads to a concomitant change in emission frequency. We tested our hypothesis in a hipposiderid bat, *Hipposideros armiger*, and measured how the circadian variation of body temperature at activation phases affected  $f_{rest}$ . With a miniature temperature logger, we recorded the skin temperature on the back of the bats simultaneously with echolocation signals produced. During warm-up from torpor strong temperature increases were accompanied by an increase in  $f_{rest}$ , of up to 1.44 kHz. We discuss the implications of our results for the organization and function of the audio-vocal control systems of all DS compensating bats.

## Introduction

The auditory system of bats using the flutter detection echolocation strategy is highly specialized for the extraction of behaviourally relevant information in echoes from fluttering prey (rev. in Neuweiler et al., 1980; rev. in Schnitzler and Ostwald, 1983; rev. in Schnitzler and Denzinger, 2011; rev. in Fenton et al., 2012; rev. in Denzinger et al., 2017). Flutter detecting foragers emit echolocation

signals consisting of a long constant-frequency component, followed by a short downward frequency-modulated terminal part at high duty cycle, with highest amplitude in the second harmonic ( $CF_2$ ). In flight these bats use an extremely precise audio-vocal feedback control system to adjust the emission frequency so that the  $CF_2$  from echoes, returning from stationary targets ahead, is kept constant at the so-called reference frequency ( $f_{ref}$ ) which is defined as average  $CF_2$  from all echoes (Schnitzler, 1968; Schnitzler, 1973). By lowering the emission frequency, bats compensate for Doppler shifts (DS) in echoes from targets ahead over the whole range of their flight speeds (Schnitzler and Henson, 1980; Schoeppler et al., 2018). This echolocation behaviour has therefore been termed DS compensation (Schnitzler, 1967), and is found in rhinolophid (Schnitzler, 1968) and hipposiderid bats (Gustafson and Schnitzler, 1979) and in the mormoopid bat *Pteronotus parnellii* (Schnitzler, 1970a). In playback experiments, stationary horseshoe bats also compensated for simulated positive DS and adjusted  $CF_2$  of the playback echoes at  $f_{ref}$  (Schuller et al., 1974), although negative shifts were not compensated for.

DS compensating bats possess an auditory fovea in the cochlea, consisting of a morphologically specialized resonance area with a disproportionally high overrepresentation of hair cells tuned to frequencies at or near  $f_{ref}$  (Suga et al., 1975; Bruns, 1976b; Schuller and Pollak, 1979; Kössl and Vater, 1985b; rev. in Kössl and Vater, 1995; rev. in Vater, 2004). By the adjustment of echo  $CF_2$  at  $f_{ref}$ , DS compensation leads to a maximal activation of the resonance system in the inner ear. Afferent connections from the auditory fovea in the cochlea project to foveal areas in higher centres of the entire ascending auditory pathway with an overrepresentation of many sharply tuned neurons with best frequencies at or near  $f_{ref}$  (rev. in Neuweiler et al., 1980; rev. in Suga, 1984; rev. in Schnitzler and Denzinger, 2011). The auditory fovea is also featured in the auditory threshold, where the threshold minimum is narrowly tuned to the  $f_{ref}$  with a distinct threshold increase to lower frequencies (rev. in Schnitzler and Denzinger, 2011). The sensory information encoded in these foveal areas acts on motor areas for vocal control and determines the  $CF_2$  of emitted echolocation signals, thus completing the audio-vocal control loop (Schuller and Rübsamen, 1981; Rübsamen and Betz, 1986; Metzner, 1989; Kössl and Vater, 2000).

When flutter detecting bats vocalize while resting, they keep the  $CF_2$  of their signals similarly constant with high precision at the so-called resting frequency ( $f_{rest}$ ;  $CF_2$  average of emitted pulses) with deviations of not more than 0.1–0.2% (rev. in Schnitzler and Denzinger, 2011; Schoeppler et al., 2018). In all flutter detecting foragers,  $f_{ref}$  and  $f_{rest}$  are tightly coupled with a species-specific offset between the two of not more than a few hundred Hz (rev. in Schnitzler and Denzinger, 2011). This constancy of  $f_{rest}$  and  $f_{ref}$  has been supported in experiments over only very short time periods (i.e. a

few seconds). At longer time periods, however, intra-individual variations of  $f_{\text{rest}}$  have been documented for several species of flutter detecting foragers (rhinolophids: Long and Schnitzler, 1975; Hiryu et al., 2008; Furusawa et al., 2012; hipposiderids: Riquimaroux, 2000; Hiryu et al., 2006; Schoeppler et al., 2018; *P. parnellii*: Suga et al., 1987; Gaioni et al., 1990). A change of  $f_{\text{rest}}$  over the course of several days or months often occurred as a gradual decrease with time, sometimes accompanied by reversion back to the original  $f_{\text{rest}}$ . The highest individual variations have been observed in hipposiderids, in a long-term study of *Hipposideros terasensis*, all bats decreased or increased their  $f_{\text{rest}}$  in the same direction with variations of 3 kHz on average (Hiryu et al., 2006). Integration of new individuals to a preexisting colony usually provoked an increase in frequency and isolations and always resulted in large drops in  $f_{\text{rest}}$ . A common feature of all these reports is that the documented intra-individual frequency shifts relate to specific behavioural situations and/or to a specific social context (Hiryu et al., 2006) but do not offer a physiological mechanism which explains them.

Physiological mechanisms which may be responsible for variations of  $f_{\text{rest}}$  and  $f_{\text{ref}}$  have only been studied in the mormoopid bat *P. p. parnellii* (Henson et al., 1990; Huffman and Henson, 1991; 1993a; b). They found that changes of the cochlear resonance frequency (CRF), which were induced by flight activity, body temperature and contralateral noise, resulted in variations of the  $f_{\text{rest}}$  and the coupled  $f_{\text{ref}}$  in bats sitting on a swinging pendulum (Huffman and Henson, 1993a). These changes also had an effect on the best frequencies of neurons in the cochlear nucleus and in the inferior colliculus (Huffman and Henson, 1991; 1993b). The measured effects of body temperature reported in these experiments were somewhat contrasting. In the first study (Henson et al., 1990) the  $CF_2$  changes did not consistently correlate with temperature changes induced by flight activity. However, in the following experiments (Huffman and Henson, 1991; 1993a; b) a clear temperature dependency was demonstrated when the animals were warmed up by a heat lamp.

These studies on the mormoopid bat suggest that  $f_{\text{rest}}$  and  $f_{\text{ref}}$  might be labile and dependent on the physiological state of a bat. Results suggest that the temperature induced frequency shifts result from changes of the resonance properties of the foveal area in the cochlea. The closely related rhinolophid and hipposiderid bats also compensate for DS, but they are phylogenetically more distant from *P. parnellii* (Jones and Teeling, 2006). Their auditory fovea is also based on specific resonance properties of the cochlea but differs in its morphology and physiology from that of *P. parnellii* (Henson et al., 1985; Kössl, 1994; rev. in Vater, 2004; rev. in Neuweiler, 2003). Hence, mechanisms which induce changes in resonance properties in *P. parnellii* are not necessarily those that cause the changes in rhinolophids and hipposiderids.

The aim of this study is to understand how a physiological parameter (body temperature) affects  $f_{\text{rest}}$  of the echolocation signals in the hipposiderid bat *Hipposideros armiger*. We hypothesized that the activation of the foveal resonance system in the cochlea of this species (and presumably of other rhinolophid and hipposiderid bats) will change with body temperature and should lead to a concomitant frequency change of the emitted echolocation signals. With an external miniature temperature logger placed between the scapulae we measured the diurnal change of skin temperature continuously over periods of 34 hours, recorded simultaneously the echolocation signals of vocalizing bats, determined their resting frequency, and correlated  $f_{\text{rest}}$  with the measured skin temperature. We discuss our results with regard to our current view on the organisation of the audio-vocal control system for DS compensation, and in view of the resistance of DS compensation to disturbances by temperature effects.

## Materials and methods

### Animals and ethical statements

Experiments were conducted with two adult female Vietnamese round-leaf nosed bats, *Hipposideros armiger* (Hodgson, 1835), captured 2009 in the Ba Be National Park in Vietnam with permission from 13.05.2009 granted to the Vietnamese Institute of Ecology and Biological Resources, Hanoi, (No. 129/STTNSV). Bats were kept at the animal facility of the Institute for Neurobiology of the University of Tübingen in a room (6 m x 3.6 m x 3 m) under controlled abiotic conditions (12:12 hours light/dark cycle,  $26.6 \pm 2$  °C and  $60 \pm 5\%$  humidity) and housed separately in two aviaries (2.4\*1.2\*2 m and 3.2\*1.25\*2 m). During the non-experimental time the aviaries were open so that the bats could freely fly in the room. Water and mealworms (larvae of *Tenebrio molitor*) were available *ad libitum* and semi-monthly vitamin and mineral supplementary (Nutri-Cal® Albrecht GmbH, Germany; Efaderm® aristavet GmbH & Co., Germany; Korvimin® WDT eG, Germany) were administrated. Additionally, crickets (*Gryllus* spp., *Acheta domestica*), locusts (*Schistocerca gregaria*) and beetles (*Zophobas morio*, *Pachnoda marginata*) were hand-fed.

During this time, bats were trained to carry a miniature temperature logger on their back. Using positive reinforcement with favoured food like beetles and locusts, the bats learned to climb on the hand of the experimenter. When bats were accustomed to handling, we shaved off a small patch of fur between the shoulder blades and fixed a dummy with water-soluble glue (Mastix watersoluble, GRIMAS® B.V., Holland; residue-free removable, safe for use with children) onto the shaved spot between the shoulder blades to get the bat accustomed to an object. After this habituation procedure, we attached the miniature temperature logger for registration of skin temperature. The weight of the logger was 1.66 g and corresponded to less than 3% of subject body weight, which was

60 g on average. The logger did not affect behaviour. After each session, the logger was removed with water.

The experiments were conducted in accordance with the German Animal Welfare Legislation and did not require explicit approval (letter from the approval authority from March 29th, 2012). The license to keep *Hipposideros armiger* was issued by the responsible agency (Regierungspräsidium Tübingen, Germany).

### **Experimental setup and recordings**

During an experiment we recorded the skin temperature between the shoulder blades every minute with an i-Button ETL1 miniature temperature logger (Maxim Integrated™, USA). The logger had a temperature range from +15 to +46 °C and a resolution of 0.125 °C. During this time, we also made continuous sound recordings (PCTape, Animal Physiology, University of Tübingen). The echolocation signals were picked up with a custom-made ultrasonic microphone (frequency response within 5 dB in the range of the echolocation signals), amplified, digitized with a sampling rate of 480 kHz, 16-bit, and stored as .wav files. The microphone was positioned around 80 cm under the bat's preferred resting place and recorded all emitted signals with sufficient quality independent of the bat's position in the aviary.

Each bat was tested in two separate sessions each lasting 34 hours. The recordings started approximately 5 hours before a light was turned off. The experimenter entered the room 1-2 hours after the beginning of this dark phase and stayed in the room for up to 25 minutes conducting usual husbandry activities. Additionally, the experimenter entered the room again at the end of the dark phase and checked visually the condition of the animal and the fit of the logger. During the experiment phase, bats had been familiar both with this procedure and the experimenter for several months prior. After warming up, bats generally flew to the experimenter and landed nearby or even on the hand to receive crickets or beetles.

### **Data analysis and statistics**

Data from the temperature logger were exported via an USB reader and OneWireViewer software (both Maxim Integrated™, USA.). Depending on the fit of the logger, the maximum skin temperature varied up to 3 °C between the sessions. We therefore calculated the skin temperature relative to the maximum of one session (Figs 1, 2) and relative to the maximum of each rise (Figs 3B–5; S1). Temperature values were not normally distributed (Shapiro Wilk test  $p < 0.05$ ). Therefore, a Wilcoxon rank sum tests was conducted, to test for differences in skin temperature between light and dark phases with two complete 24h cycles lasting from 8:00 to 8:00 hours per bat.

Sound analysis was conducted with the software Selena (University of Tübingen) in colour spectrograms. We first measured the calling activity of a bat over 24 hours to test whether the calling activity was associated with change in skin temperature. To determine calling activity we subdivided the 24-hour recording in time bins of three minutes. For every time bin we determined in steps of five seconds whether the bat was vocalizing. We defined calling activity if the bat emitted at least 10 signals within the five-second time slot. The calling activity within the three-minute time bin was calculated as the percentage of calling activity from the 36 five-second time slots of each three-minute bin. For example, the calling activity in the three-minute time bin was 100% if the bat emitted at least 10 calls during each five-second interval. Since a normal distribution was not observed across the data (Shapiro Wilk test  $p < 0.05$ ), we performed a Wilcoxon rank sum test to test whether the calling activity differed between the light and dark phase.

To measure changes in  $CF_2$  caused by the activation of the bats we determined the  $CF_2$  of resting signals also known as resting frequency ( $f_{rest}$ ) emitted two hours before and two hours after the entrance of the experimenter. Calls were displayed in a five-second window as spectrograms between 60 and 75 kHz using an FFT with 8192 points (zero padding), which resulted in a frequency resolution of 20.25 Hz.  $f_{rest}$  was manually measured as average maximum frequency over all calls in the five-second window. We only used five-second time slots with at least 10 signals, as single calls and in some cases the first few calls (up to 3) in slots with calling activity were very different in frequency compared to the others. They were excluded from  $f_{rest}$  measurements.

Further, we correlated the increase in skin temperature from beginning of activation to its maximum with the percentage calling activity in the three-minute time span before the entrance of the experimenter, and tested it via a Spearman correlation. Although Shapiro Wilk test ( $p > 0.05$ ) indicates a normal distribution we conducted a non-parametric test to reduce the impact of outliers. To correlate the increase in skin temperature with the increase of  $f_{rest}$  from activation to its maximum, we averaged the  $f_{rest}$  per minute. We tested for significance with a Spearman correlation (normal distribution was not observed, Shapiro Wilk test  $p < 0.05$ ).

We plotted the normalized  $f_{rest}$  and the normalized skin temperature over time from the point of entrance to the respective maximum. Additionally, we determined the minimum in skin temperature from the peak in skin temperature within 30 minutes thereafter. We fitted the correlation with linear trend lines to the increasing part after activation until frequency maximum, and to the decreasing part from skin temperature maximum until its described minimum. The slopes of these trend lines were statistically tested with the Sign-test (Sokal and Rohlf, 1995).

## Results

### Diurnal rhythm of skin temperature

In two individuals of *H. armiger* (referred to hereafter as “Bat 1” and “Bat 2”), skin temperature was continuously measured every minute in two sessions each lasting 34 h. Skin temperature was never stable. However, the diurnal pattern of the change in skin temperature was rather similar between both, session and animal, and indicated the influence of the light/dark cycle as well as the influence of external stimuli, e.g., the entrance of the experimenter (Fig. 1). Skin temperature was slightly higher during dark phase when the nocturnal bats were more active than during the light phase. Relative to the normalized maximum skin temperature ( $t_{\max}$ ) reached in a given session, the median of the skin temperature was 2.1°C (Bat 1) and 2.8°C (Bat 2) below  $t_{\max}$  in the dark phase and 2.9°C (Bat 1) and 4.3°C (Bat 2) below  $t_{\max}$  in the light phase. (Bat 1:  $Z = -10.35$ ,  $n_{\text{light}} = 1440$ ,  $n_{\text{dark}} = 1440$ ,  $p < 0.0001$ , Bat 2:  $Z = -23.26$ ,  $n_{\text{light}} = 1440$ ,  $n_{\text{dark}} = 1440$ ,  $p < 0.0001$ ). The highest difference to  $t_{\max}$  was measured during the light phase with relative values of 4.9 to 5.9 °C below  $t_{\max}$ . The strongest effects of distinct skin temperature rises were observed when the experimenter entered the room. After this external stimulus the  $t_{\max}$  was reached within 4–21 min (Table 1) and decreased afterwards at a slower rate. The relative increase in skin temperature depended on the skin temperature prior to stimulation and was higher at initially low skin temperatures (Fig. 1). For further analysis of temperature effects on  $f_{\text{rest}}$  we concentrated only on the distinct skin temperature increases resulting from the activation of the bats by the experimenter (see Fig. 1).

### Variation of skin temperature and calling activity

The diurnal calling activity pattern is characterized by periods lasting up to 26 min where bats emitted more or less continuous calls separated by longer silent periods (Fig. 2A). Calling activity was influenced by the light/dark cycle as well as by external stimuli (Fig. 2). Overall, average calling activity during light periods (average 9%) did not significantly differ from calling activity during dark periods (average 12%,  $Z = -0.3$ ,  $n_{\text{light}} = 241$ ,  $n_{\text{dark}} = 242$ ,  $p = 0.7637$ ). Calling activity was high at rising skin temperatures (Fig. 2B, D). The minimum in skin temperature occurred during light periods and in the example in Fig. 2B it was correlated with the lowest calling activity (silence for two hours). The strongest effects, with a distinct increase in skin temperature and in calling activity were observed when the experimenter entered the room (Figs 2, S1). Therefore, we used this reaction to investigate the relation between  $f_{\text{rest}}$  and skin temperature. The bat displayed in Fig. 2C and D increased calling activity about four minutes before the experimenter entered the room, followed by an increase in skin temperature. Calling activity remained at 100% as long as the experimenter was in the room and dropped rapidly after experimenter exit, accompanied by a slightly decreasing skin temperature (Fig. 2C, D).



### Variation of skin temperature and resting frequency

When activated by the experimenter, *H. armiger* reacted not only with an increase in skin temperature and calling activity, but also shifted the CF<sub>2</sub> of the resting signals ( $f_{\text{rest}}$ ) continuously towards higher frequencies (Figs 2E, 3A, S1). Both skin temperature and  $f_{\text{rest}}$  increased steeply to a maximum (Figs 2E, 3A, S1 and Table 1). Generally, bats with a high calling activity in the three minutes prior to activation also had a higher initial skin temperature and a higher initial  $f_{\text{rest}}$  and therefore a smaller increase in each (Table 1, Figs 3A, 4A). Increase in skin temperature and calling activity were inversely correlated (Spearman's  $\rho$  (N=12) = -0.675,  $p$  = 0.0160) (Fig. 4A). The maximum in  $f_{\text{rest}}$  ( $f_{\text{max}}$ ) was reached earlier (within 2–9 min) than the  $t_{\text{max}}$  (within 4–21 min), except in one case, when the frequency and the skin temperature simultaneously reached the maximum after four minutes (Table 1). The relative increase of the  $f_{\text{rest}}$  ranged between 0.24–1.44 kHz with increase rates of 60–160 Hz/min or 90–350 Hz/°C (skin temperature). The  $t_{\text{max}}$  was reached on average 6 ( $\pm$ 4) min after the  $f_{\text{max}}$  but the longest interval measured 14 min. The relative increase of skin temperature ranged between 1.13 and 5.75 °C, with increase rates between 0.13–0.43°C/min. The relative increases in frequency were positively correlated with relative increases in skin temperature (Spearman's  $\rho$  (N=12) = 0.79,  $p$  = 0.0022) (Fig. 4B).

In the time span between  $f_{\text{max}}$  and  $t_{\text{max}}$  the skin temperature increased by 1.1 °C on average (0.6–2.1 °C) in 11 of 12 cases, whereas the  $f_{\text{rest}}$  was decreasing slightly, by an average of 70 Hz. Only in number IV and VI of Bat 2 (Figs 3B, 5) the  $f_{\text{rest}}$  reduction was much higher (values of 320 and 390 Hz, respectively, Table 1, Figs 3, 5). After the  $t_{\text{max}}$  was reached, skin temperature and  $f_{\text{rest}}$  decreased slowly in both bats (Figs 5, S1). Skin temperature dropped at an average rate of 0.04°C/min and reached a minimum within 18–30 minutes (0.75–1.5 °C below the maximum).  $f_{\text{rest}}$  decreased to the range of 90–600 Hz, with an average rate of 10 Hz/min or 390 $\pm$ 240 Hz/°C (skin temperature), and 310 $\pm$ 160 Hz/°C (skin temperature) after removal of two Bat 2 outliers (IV and VI). Although the peaks of these two variables did not occur at the same time, the  $f_{\text{rest}}$  increased always with increasing skin temperature until  $f_{\text{max}}$  was reached (Sign-test  $p$ =0.031 for both bats). Likewise, the  $f_{\text{rest}}$  decreased concurrently with decreasing skin temperature after the  $t_{\text{max}}$  was reached (sign-test  $p$ =0.031 for both bats) (Fig. 5).

### Discussion

In this study, we investigated the influence of the circadian changes of body temperature on the CF<sub>2</sub> of resting signals (resting frequency or  $f_{\text{rest}}$ ) in *Hipposideros armiger*. With this approach we tested the hypothesis that body temperature influences the resonance conditions in the foveal area of the cochlea in a DS compensating hipposiderid bat. Previous work had suggested this occurs in a



mormoopid bat (Huffman and Henson, 1991; 1993a; b) but this had never been tested in hipposiderid or rhinolophid bats before. The concomitant change in cochlear output should lead to a different activation of the audio-vocal control system, which should result in a readjustment of the emission frequency and its rise with increasing body temperature.

The circadian variation of the skin temperature of *H. armiger* was strongly determined by external Zeitgeber (Fig. 1). At the beginning and end of a dark phase, bats reacted to the entrance of the experimenter with a distinct increase of body temperature to a maximal value, which was always accompanied by a continuous emission of signals with rising  $f_{\text{rest}}$  (Figs 2, S1). Sometimes bats increased their calling activity prior to experimenter entrance, which may indicate that they were accustomed to the regular husbandry procedures and were waiting to be fed. The magnitude of the induced skin temperature shifts varied strongly, for instance, between 1.13 °C (Bat 1/V) and 5.75 °C (Bat 2/VI). Skin temperature shifts of similar size were also observed in other parts of the dark phases and even during some light phases. However, often they were not accompanied with a continuous calling activity. Therefore, we concentrated analyses only on activation periods, which were induced by the experimenter.

After the bats' activation, values of both skin temperature and  $f_{\text{rest}}$  increased to a maximum. Generally, frequency maxima ( $f_{\text{max}}$ ) were reached earlier than skin temperature maxima ( $t_{\text{max}}$ ). In the time span between  $f_{\text{max}}$  and  $t_{\text{max}}$ , the skin temperature continued to increase and afterwards was maintained at the  $t_{\text{max}}$  level for some time before it was slowly reduced.

If it is indeed temperature that is determining  $f_{\text{rest}}$ , the question remains as to why  $f_{\text{max}}$  was reached before the  $t_{\text{max}}$  of skin temperature. One explanation could be that the skin temperature, which we measured with our sensor between the shoulder blades, differed from the temperature in the cochlea, the location that is hypothesized to affect the adjustment of  $f_{\text{rest}}$ . Several studies suggest that at constant ambient temperature, the skin temperature, measured in a neck fold or between the scapulae, gives a good approximation of body temperature (e.g., Audet and Thomas, 1996; Barclay et al., 1996; Henson et al., 1990; Huffman and Henson, 1993a; Willis and Brigham, 2003). However, during the warming up phase of torpid bats, Willis and Brigham (2003) observed differences between the core temperature of body and skin temperature. Body temperature measured continuously with an implanted transmitter in the intraperitoneal cavity and compared to the skin temperature between the scapulae suggested that upon arousal from torpor, the increase rate in body temperature (0.52 °C/min) was higher than the increase rate in skin temperature (0.44 °C/min). This may explain why the body core temperature along with cochlear temperature reached

their maxima earlier than skin temperature. Due to the fact that the measured increase in skin temperature does not exactly reflect the increase of the core temperature and/or cochlea temperature, we cannot determine the average increase rate of frequency relative to body temperature.

At 10 of the 12 conditions (except condition IV and VI of Bat 2), a moderate increase in skin temperature led to the  $f_{\max}$ , which was reached between  $-2\text{ }^{\circ}\text{C}$  and the  $t_{\max}$  and was maintained until the relative skin temperature had reached its maximum. Afterwards, the body temperature and  $f_{\text{rest}}$  slowly decreased, which was also accompanied by a decrease in skin temperature. The exceptions are conditions IV and VI of Bat 2, where the overall increase in skin temperature was higher. These two conditions have in common that the skin temperature at beginning of the activation was distinctly lower, which indicates that the bat may have been in a state of deeper torpor in these situations, and which may explain these differing results.

From these experiments, we conclude that in *H. armiger* body temperature determines  $\text{CF}_2$  of the emitted signals, and that an increase in temperature leads to an increase in emission frequency. According to the close phylogenetic relationship, we propose that this result may also hold for all hipposiderid and rhinolophid bats, although further testing of this hypothesis is warranted.

The influence of body temperature on the  $\text{CF}_2$  in a DS compensating bat was only previously shown in the mormoopid *P. parnellii* (Huffman and Henson, 1993a). They found that changes of body temperature correlated positively with the  $\text{CF}_2$  of the coupled  $f_{\text{rest}}$  and  $f_{\text{ref}}$  and also with the cochlear resonance frequency (CRF). Further, flight and contralateral sound exposure also shifted CRF, and along with it the  $f_{\text{rest}}$  and  $f_{\text{ref}}$ . Temperature also had influence on the offset between  $f_{\text{rest}}$  and  $f_{\text{ref}}$ , which was reduced slightly with increasing temperature. The authors concluded that the induced changes of CRF were responsible for the observed changes of  $\text{CF}_2$  in stationary bats and in DS compensating bats on a pendulum. They discussed the possible existence of a feedback mechanism for sound emission, where a “set point” of neural activity in the vocal centres detects the coincidence of both the activation of the narrow band to which the cochlea is most sensitive, and the frequency of the emitted  $\text{CF}_2$ . Huffman et al. (1991) and Huffman and Henson (1993b) complemented the temperature studies in *P. parnellii* by showing that the neuronal tuning of foveal neurons of the cochlear nucleus and of the inferior colliculus were also labile, and could change with temperature.

Further evidence, that the tuning of the cochlea of DS compensating bats depends on their physiological state, comes from studies with anesthetized bats. Audiograms of anaesthetized rhinolophids and hipposiderids differ conspicuously from those of non-anesthetized bats similar to observations of *P. parnellii* (Neuweiler, 1970: *R. ferrumequinum*; Pollack et al., 1972: *Chilonycteris p. parnellii* (*P. parnellii*); Foeller and Kössl, 2000: *H. lankadiva*). Further, in a study in which the physiological properties of the inner ear of the rhinolophid *R. rouxi* and the mormoopid *P. parnellii* were directly compared, Henson et al., 1985 described not only the influence of anaesthesia on the sensitivity and tuning of audiograms in *R. rouxi*, but also suggested (without reporting corresponding data) that the cochlear microphonic audiograms were affected by temperature. Effects of temperature and anaesthesia on the foveal resonance system of *P. parnellii* were also reported from Kössl and Vater (1985) who measured cochlear microphonic potentials and evoked otoacoustic emissions.

All DS compensating bats possess an auditory fovea, which is based on a mechanical resonance system in the cochlea and a highly expanded frequency representation in the frequency range of  $CF_2$ . Therefore, we propose similar influences on the foveal resonance system in the cochlea and concomitant shifts in  $CF_2$ , regardless of the phylogenetic relationship of taxa. While acknowledging the marked differences in cochlear mechanics of the foveal tuning system in *P. parnellii* and in rhinolophid and hipposiderid bats (Henson et al., 1985), we assume that similarities in the effects of temperature and anaesthesia on the foveal tuning and the concomitant adjustment of  $CF_2$  as demonstrated in the current study for *H. armiger* and by others for *P. parnellii* indicate a similar audio-vocal control principle in all DS compensating bats.

We found that the variation of body temperature of *H. armiger* results in a concomitant change in  $f_{rest}$ . Due to the coupling of  $f_{rest}$  and  $f_{ref}$  we are confident that temperature effects both frequencies in a similar way. The temperature dependent variability of the  $CF_2$  allows conclusions on the function of the audio-vocal control system of DS compensating bats. The controlled process variable of the audio-vocal feedback control system is the activation state of the foveal resonance area in the cochlea. This cochleo-topic activation status is reported to the audio-vocal control centre by the afferent foveal areas of the auditory pathway. The emission frequency is changed if the reported process variable differs from the set point condition of the central control system. At deviations, some kind of push/pull mechanism changes via efferent motor pathways the emitted  $CF_2$  with inhibitory feedback lowering and excitatory feedback increasing the emitted  $CF_2$  (Metzner et al., 2002). A change of the emitted  $CF_2$  modifies, through feedback, the whole auditory input consisting of the emitted signal and of all returning echoes until the foveal input into the vocal control centre

has reached the set point condition again. Flying bats perceive the auditory input consisting of the emitted signal and its delayed Doppler shifted echoes and adjust the emission frequency in such a way that the highest echo frequency in the perceived pulse-echo train is, independent of flight speed, kept constant at the so-called reference frequency (average of echoes with highest DS returning from ahead) with a standard deviation of 0.1–0.2% (Schnitzler and Denzinger, 2011; Schoeppler et al., 2018). Resting bats perceive the auditory input consisting of the emitted resting signals and their delayed non-Doppler shifted echoes and adjust the emission frequency at the so-called resting frequency (averaged emission frequency of stationary bats) which is kept constant within short periods (again with a standard deviation of 0.1–0.2%, Schnitzler and Denzinger, 2011; Schoeppler et al., 2018). The coupling between resting and reference frequency indicates that the activation state of the cochlea by the pulse-echo train of resting and of reference frequency is most likely similar if the two coupled frequencies are separated by the observed offset, between 50–300 Hz (Schnitzler and Denzinger, 2011). Our data from *H. armiger* and previous data from *P. parnellii* (Huffman et al., 1991; Huffman and Henson, 1993b) suggest a similar mechanism of the audio-vocal control system in all other DS compensating hipposiderids and rhinolophids.

We suggest here that the tuning of the hard-wired auditory fovea cannot be deliberately varied. According to the data collected, all reported changes of resting and/or reference frequency in DC compensating bats originate from the audio-vocal control system either by morphological or physiological changes of the resonance system. Irreversible changes of  $CF_2$  in adult bats may be related to aging processes, which change the tuning properties of the foveal resonance system. The observation that wild living *R. ferrumequinum* aged 10–23 years (Jones and Ransome, 1993) dropped  $f_{rest}$  by about 200 Hz/year and that one individual of *H. armiger* and one individual of *Rhinolophus paradoxolophus* dropped  $CF_2$  by 1 and 0.9 kHz, respectively (own observation), may be explained by age related morphological changes in the inner ear. A well-studied example of how growth-related changes in morphology influence the  $CF_2$  is the increase of  $CF_2$  of young DS compensating bats during ontogeny (rev. in Rübsamen, 1992; rev. in Vater et al., 2003).

We assume, that, if aging processes can be excluded, variations in  $f_{rest}$  and/or the coupled  $f_{ref}$  underly reversible physiological mechanisms that influence the nature of the travelling wave. It has been shown that cochlear micromechanics changed with temperature. For instance, weak temperature effects were found in the motility of the outer hair cells of guinea pigs (rev. in Ashmoore 2008). Though these effects seem to be marginal in other mammals, they may be distinctive in DS compensating bats due to the high expansion of the frequency representation at their auditory fovea.

For instance, changes of  $f_{\text{rest}}$  and/or  $f_{\text{ref}}$ , which have been attributed to social interactions, may in fact be related to temperature effects (Hiryu et al., 2006; Furusawa et al., 2012). A strong support for our temperature hypothesis is the observation that a drop in body temperature was indicative of a subject that was close to death. Furusawa et al. (2012) described a large frequency drop of 2 kHz in a sick bat before it too perished. Also, Hiryu et al. (2006) measured a significant decrease in  $f_{\text{rest}}$  before a bat died. We suggest that these sick bats reduced their body temperature and with it  $f_{\text{rest}}$ . In future studies on the effects of social interactions on  $CF_2$ , it should also be tested whether these interactions occur simultaneously with body temperature changes, which could also explain the observed frequency changes.

Besides DS compensating bats, other vertebrates also have hearing systems that are influenced by body temperature. Changes in the sensitivity of audiograms and of also the tuning of single neurons have been reported for amphibians, reptiles, and birds (e.g., Hubl, Mohnke and Schneider, 1977; Walkowiak, 1980; Smolders and Klinke, 1984; Schermuly and Klinke, 1985). In guinea pigs a correlation between the temperature and the characteristic frequency of neurons was not observed (Gummer and Klinke, 1983), but a loss in sharpness and an increase in threshold did occur. In the non-DS compensating bat *Myotis lucifugus*, temperature reduction led to a reversible decrease of sensitivity of the N1 response to all frequencies, with a greater effect observed at higher frequencies (Harrison, 1965).

In humans a variation of the characteristic frequency of spontaneous otoacoustic emissions observed during menstrual or diurnal cycles, as well as during fever, has been discussed (Wit, 1985) and supported (Wilson, 1986; O'Brien, 1994) as an effect of body temperature. Bell (1982), however, found no body temperature effect, and suggested that a more likely candidate was changes in hormonal or cardiovascular activity. Wynn (1972) found small variation in estimation of absolute pitch in both women and men, due to hormonal cycle or illness. Strong evidence that hormones play a role in ear activity is the presence of beta1-adrenergic receptors in the Organ of Corti which Fauser et al. (2004) found in gerbils. They conclude that the sympatric innervation may enhance the potassium ( $K^+$ ) efflux in the inner and outer hair cells. Therefore, we cannot exclude that in DS compensating bats, additional physiological factors may have an influence on the resonance properties of the cochlea.

## Conclusion

The observed increase of  $f_{\text{rest}}$  in warm-up phases of *H. armiger* reflect a change in the temperature dependent controlled process variable of the audio-vocal control system, i.e., the cochleo-topic activation state of the foveal resonance area in the cochlea. A concomitant change in emission frequency occurs if the state which is reported to higher foveal centres deviates from the central set point condition, due to increases in body, and therefore cochlea, temperatures. We propose to generalize our conclusions to all other DS compensating hipposiderids and rhinolophids bats and also to the DS compensating mormoopid bat *P. parnellii*, based on findings that this species reacts in a comparable way to changes in body temperature. The cochleo-topic organization of the feedback control system guarantees an undisturbed function of Doppler shift compensation independent of physiologically determined changes of emission frequency.

## List of abbreviations

|                   |                                                       |
|-------------------|-------------------------------------------------------|
| CF <sub>2</sub>   | = constant-frequency component of the second harmonic |
| CRF               | = cochlear resonance frequency                        |
| DS                | = Doppler shift                                       |
| f <sub>max</sub>  | = frequency maximum                                   |
| f <sub>ref</sub>  | = reference frequency                                 |
| f <sub>rest</sub> | = resting frequency                                   |
| t <sub>max</sub>  | = relative skin temperature maximum                   |

## Acknowledgements

We would like to thank Vu Dinh Thong and Christian Dietz for catching bats in Vietnam. Further we thank Markus Schuller for technical support and Peter Pilz for statistical assistance.

## Competing interests

The authors declare no competing or financial interests.

## Funding

This research was supported by the Werner Reichardt Centre for Integrative Neuroscience (CIN) at the University of Tübingen. The funder had no influence on study design, data collection and analyzation, manuscript preparation or publication of the study.

## References

- Ashmore, J.** (2008). Cochlear outer hair cell motility. *Physiol. rev.* **88**(1), 173-210.
- Audet, D. and Thomas, D. W.** (1996). Evaluation of the accuracy of body temperature measurement using external radio transmitters. *Can. J. Zool.* **74**(9), 1778-1781.
- Barclay, R. M., Kalcounis, M. C., Crampton, L. H., Stefan, C., Vonhof, M. J., Wilkinson, L. and Brigham, R. M.** (1996). Can external radiotransmitters be used to assess body temperature and torpor in bats?. *J. Mammal.* **77**(4), 1102-1106.
- Bell, A.** (1992). Circadian and menstrual rhythms in frequency variations of spontaneous otoacoustic emissions from human ears. *Hear. R.* **58**(1), 91-100.
- Bruns, V.** (1976). Peripheral auditory tuning for fine frequency analysis by the CF-FM Bat, *Rhinolophus ferrumequinum*. *J Comp Physiol.* **106**(1), 87-97.
- Denzinger, A., Tschapka, M. and Schnitzler, H.-U.** (2018). The role of echolocation strategies for niche differentiation in bats. *Can. J. Zool.* **96**(3), 171-181.
- Fauser, C., Schimanski, S. and Wangemann, P.** (2004). Localization of  $\beta$ 1-adrenergic receptors in the cochlea and the vestibular labyrinth. *J. Membr. Biol.* **201**(1), 25-32.
- Fenton, M. B., Paul, A. F. and Ratcliffe, J. M.** (2012). Evolution of high duty cycle echolocation in bats. *J. Exp. Biol.* **215**(17), 2935-2944.
- Kössl, M. and Vater, M.** (2000). Consequences of outer hair cell damage for otoacoustic emissions and audio-vocal feedback in the mustached bat. *J. Assoc. Res. Otolaryng.* **1**(4), 300-314.
- Furusawa, Y., Hiryu, S., Kobayasi, K. I. and Riquimaroux, H.** (2012) Convergence of reference frequencies by multiple CF-FM bats (*Rhinolophus ferrumequinum nippon*) during paired flights evaluated with onboard microphones. *J. Comp. Physiol. A.* **198**(9), 683-693.
- Gaioni, S. J., Riquimaroux, H. and Suga, N.** (1990). Biosonar behavior of mustached bats swung on a pendulum prior to cortical ablation. *J. Neurophysiol.* **64**(6), 1801-1817.



**Gummer, A. W. and Klinke, R.** (1983). Influence of temperature on tuning of primary-like units in the guinea pig cochlear nucleus. *Hear. R.* **12(3)**, 367-380.

**Gustafson, Y. and Schnitzler, H.-U.** (1979). Echolocation and obstacle avoidance in the hipposiderid bat, *Asellia tridens*. *J. Comp. Physiol. A.* **131**, 161-167.

**Harrison, J. B.** (1965). Temperature effects on responses in the auditory system of the little brown bat *Myotis l. lucifugus*. *Physiol. Zool.* **38(1)**, 34-48.

**Henson, O. W., Schuller, G. and Vater, M.** (1985). A comparative study of the physiological properties of the inner ear in Doppler shift compensating bats (*Rhinolophus rouxi* and *Pteronotus parnellii*). *J. Comp. Physiol. A.* **157(5)**, 587-597.

**Henson, O. W., Koplas, P. A., Keating, A. W., Huffman, R. F. and Henson, M. M.** (1990). Cochlear resonance in the mustached bat: behavioral adaptations. *Hear. Res.* **50(1)**, 259-273.

**Hiryu, S., Katsura, K., Nagato, T., Yamazaki, H., Lin, L. K., Watanabe, Y. and Riquimaroux, H.** (2006). Intra-individual variation in the vocalized frequency of the Taiwanese leaf-nosed bat, *Hipposideros terasensis*, influenced by conspecific colony members. *J. Comp. Physiol. A.* **8**, 807-815.

**Hiryu, S., Shiori, Y., Hosokawa, T., Riquimaroux, H. and Watanabe, Y.** (2008). On-board telemetry of emitted sounds from free-flying bats: compensation for velocity and distance stabilizes echo frequency and amplitude. *J. Comp. Physiol. A.* **194(9)**, 841-851.

**Hubl, L., Mohneke, R. and Schneider, H.** (1977). Temperature dependence of auditory thresholds in two central european anurans, *Bombina variegata variegata* (L.) and *Rana ridibunda ridibunda* pall. (amphibia), and its relation to calling. *Behav. processes.* **2(4)**, 305-314.

**Huffman, R. F. and Henson, Jr. O. W.** (1991). Cochlear and CNS tonotopy: normal physiological shifts in the mustached bat. *Hear. Res.* **56(1)**, 79-85.

**Huffman, R. F. and Henson, Jr. O. W.** (1993a). Labile cochlear tuning in the moustached bat. I. Concomitant shifts in biosonar emission frequency. *J. Comp. Physiol. A.* **171**, 725-734.

**Huffman, R. F. and Henson, Jr. O. W.** (1993b). Labile cochlear tuning in the moustached bat. II. Concomitant shifts in neuronal tuning. *J. Comp. Physiol. A.* **171**, 735-748.

**Jones, G. and Ransome, R. D.** (1993). Echolocation calls of bats are influenced by maternal effects and change over a lifetime. *Proc. Royal Soc. B*; **252(1334)**, 125-128.

**Jones, G. and Teeling, E. C.** (2006). The evolution of echolocation in bats. *Trends Ecol. Evol.* 2006; **21(3)**, 149-156.

**Kössl, M.** (1994). Otoacoustic emissions from the cochlea of the 'constant frequency' bats, *Pteronotus parnellii* and *Rhinolophus rouxi*. *Hear. Res.* **72(1-2)**, 59-72.

**Kössl, M. and Vater, M.** (1985b). The cochlear frequency map of the mustache bat, *Pteronotus parnellii*. *J. Comp. Physiol. A.* **157(5)**, 687-697.

**Kössl, M. and Vater, M.** (1995). Cochlear structure and function in bats. In *Hearing by bats* (ed. A.N. Popper and R.R. Fay), pp. 191-234. New York, NY: Springer.

**Kössl, M. and Vater, M.** (2000). Consequences of outer hair cell damage for otoacoustic emissions and audio-vocal feedback in the mustached bat. *J. Assoc. Res. Otolaryngol.* **1(4)**, 300-314.

**Long, G. R. and Schnitzler, H.-U.** (1975). Behavioural audiograms from the bat, *Rhinolophus ferrumequinum*. *J. Comp. Physiol.* **100(3)**, 211-219.

**Metzner, W.** (1989). A possible neuronal basis for Doppler-shift compensation in echo-locating horseshoe bats. *Nature.* **341(6242)**, 529-532.

**Metzner, W., Zhang, S. and Smotherman, M.** (2002). Doppler-shift compensation behavior in horseshoe bats revisited: auditory feedback controls both a decrease and an increase in call frequency. *J. Exp. Biol.* **205(11)**, 1607-1616.

**Neuweiler, G.** (2003). Evolutionary aspects of bat echolocation. *J. Comp. Physiol. A.* **189(4)**, 245-256.

**Neuweiler, G., Bruns, V. and Schuller, G.** (1980). Ears adapted for the detection of motion, or how echolocating bats have exploited the capacities of the mammalian auditory system. *J. Acoust. Soc. Am.* **68(3)**, 741-753.

**O'Brien, A. J.** (1994). Temperature dependency of the frequency and level of a spontaneous otoacoustic emission during fever. *B. J. Audiol.* **28(4-5)**, 281-290.

**Pollak, G., Henson, O. W. and Novick, A.** (1972). Cochlear microphonic audiograms in the "pure tone" bat *Chilonycteris parnellii parnellii*. *Science*. **176(4030)**, 66-68.

**Riquimaroux, H.** (2000). Characteristics of bat sonar sounds recorded by a telemetry system and a fixed ground microphone. In The seventh western pacific regional acoustics conference (WESTPRACVII).

**Rübsamen, R.** (1992). Postnatal development of central auditory frequency maps. *J. Comp. Physiol. A.* **170(2)**, 129-143.

**Rübsamen, R. and Betz, M.** (1986). Control of echolocation pulses by neurons of the nucleus ambiguus in the rufous horseshoe bat, *Rhinolophus rouxi*. *J. Comp. Physiol. A.* **159(5)**, 675-687.

**Schermuly, L. and Klinke, R.** (1985). Change of characteristic frequency of pigeon primary auditory afferents with temperature. *J. Comp. Physiol. A.* **156(2)**, 209-211.

**Schnitzler, H.-U.** (1967). Kompensation von Dopplereffekten bei Hufeisenfledermäusen. *NW.* **54(19)**, 523-523.

**Schnitzler, H.-U.** (1968). Die Ultraschall-Ortungslaute der Hufeisen-Fledermäuse (Chiroptera-Rhinolophidae) in verschiedenen Ortungssituationen. *Z. Vergl. Physiol.* **57**, 376-408.

**Schnitzler, H.-U.** (1970a). Die Echoortung bei der Fledermaus *Chilonycteris rubiginosa*. *Z. Vergl. Physiol.* **68**, 25-38.

**Schnitzler, H.-U.** (1973). Control of Doppler shift compensation in the Greater Horseshoe bat, *Rhinolophus ferrumequinum*. *J. Comp. Physiol.* **82**, 79-92.

**Schnitzler, H.-U. and Denzinger, A.** (2011). Auditory fovea and Doppler shift compensation: adaptations for flutter detection in echolocating bats using CF-FM signals. *J. Comp. Physiol. A.* **197**(5), 541-559.

**Schnitzler, H.-U. and Henson, Jr. O. W.** (1980). Performance of airborne animal sonar systems: I. Microchiroptera. In *Animal Sonar Systems* (ed. R.G. Busnel and J.F. Fish), pp. 109-181. US: Springer.

**Schnitzler, H.-U. and Ostwald, J.** (1983). Adaptations for the detection of fluttering insects by echolocation in horseshoe bats. In *Advances in vertebrate neuroethology* (ed. J.P. Ewert, R.R. Capranica, D.J. Ingle), pp. 801–827. New York: Plenum Press.

**Schoeppler, D., Schnitzler, H.-U. and Denzinger, A.** (2018). Precise Doppler shift compensation in the hipposiderid bat, *Hipposideros armiger*. *Sci. Rep.* **8**(1), 1-11.

**Schuller, G. and Pollak, G.** (1979). Disproportionate frequency representation in the inferior colliculus of Doppler-compensating Greater Horseshoe bats – Evidence for an Acoustic Fovea. *J. Comp. Physiol.* **132**, 47-54.

**Schuller, G. and Rübsamen, R.** (1981). Laryngeal nerve activity during pulse emission in the CF-FM bat, *Rhinolophus ferrumequinum*. *J. Comp. Physiol.* **143**(3), 317-321.

**Schuller, G., Beuter, K. and Schnitzler, H.-U.** (1974). Response to frequency shifted artificial echoes in bat *Rhinolophus ferrumequinum*. *J. Comp. Physiol.* **89**, 275-286.

**Smolders, J. W. and Klinke, R.** (1984). Effects of temperature on the properties of primary auditory fibres of the spectacled caiman, *Caiman crocodilus* (L.). *J. Comp. Physiol. A.* **155**(1), 19-30.

**Sokal, R. R. and Rohlf F. J.** (1995). Biometry. The principle and practice of statistics in biological research. 3<sup>rd</sup> edition. New York, USA: W. H. Freeman and company.

**Suga, N.** (1984). Neural mechanisms of complex-sound processing for echolocation. *Trends Neurosci.* **7**(1), 20-27.

**Suga, N., Simmons, J. A. and Jen, P. H.** (1975). Peripheral specialization for fine analysis of Doppler-shifted echoes in the auditory system of the “CF-FM” bat *Pteronotus parnellii*. J. Exp. Biol. **63(1)**, 161-192.

**Suga, N., Niwa, H., Taniguchi, I. and Margoliash, D.** (1987). The personalized auditory cortex of the mustached bat: adaptation for echolocation. J. Neurophysiol. **58(4)**, 643-654.

**Vater, M.** (2004). Cochlear anatomy related to bat echolocation. In *Echolocation in bats and dolphins* (ed. J. Thomas, C. Moss and M. Vater), pp. 99-103. New York, NY: Springer.

**Vater, M., Kössl, M., Foeller, E., Coro, F., Mora, E. and Russell, I. J.** (2003). Development of echolocation calls in the mustached bat, *Pteronotus parnellii*. J. Neurophysiol. **90(4)**, 2274-2290.

**Walkowiak, W.** (1980). Sensitivity, range and temperature dependence of hearing in the grass frog and fire-bellied toad. Behav. Processes. **5(4)**, 363-372.

**Willis, C. K. R. and Brigham, R. M.** (2003). Defining torpor in free-ranging bats: experimental evaluation of external temperature-sensitive radiotransmitters and the concept of active temperature. J. Comp. Physiol. B. **173(5)**, 379-389.

**Wilson, J. P.** (1986). The influence of temperature on frequency-tuning mechanisms. In *Peripheral auditory mechanisms* (ed. J.B. Allen, J.L. Hall, A. Hubbard, S.T. Neely and A. Tubis), pp. 229-236. Springer, Berlin, Heidelberg.

**Wit, H. P.** (1985). Diurnal cycle for spontaneous oto-acoustic emission frequency. Hear. Res. **18(2)**, 197-199.

**Wynn, V. T.** (1972). Measurements of small variations in ‘absolute’ pitch. J. Physiol. **220(3)**, 627-637.

## Figures

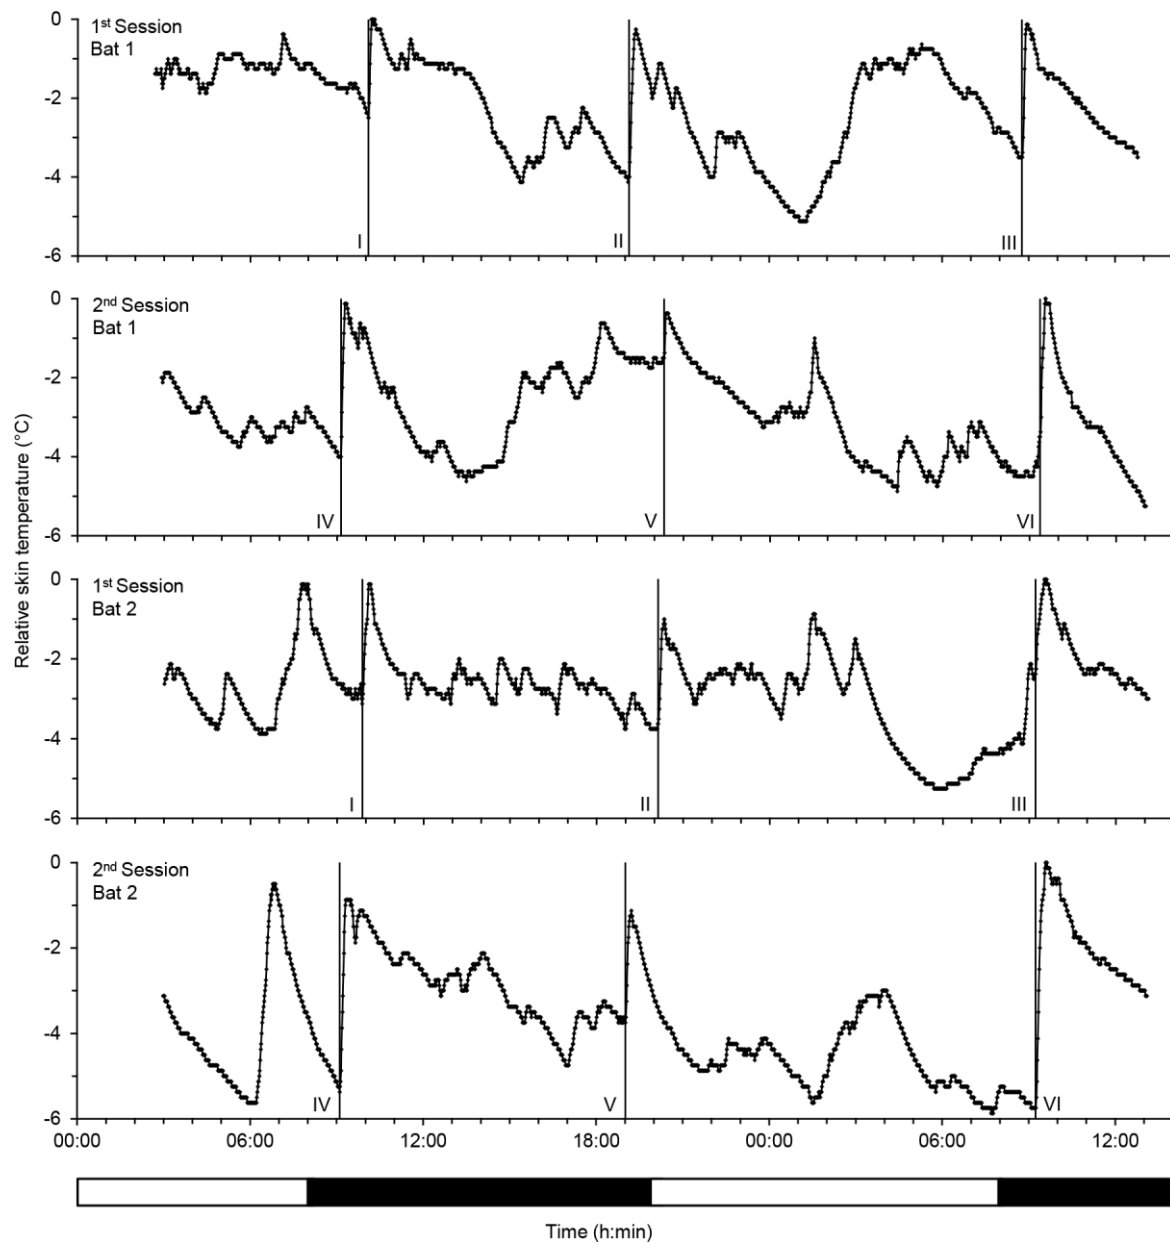

**Figure 1: Relative skin temperature of Bat 1 and Bat 2.** The temperature was measured every minute over a period of 24-hour in two sessions per bat. Skin temperature is shown relative to the maximum during each period. Bats increased body temperature when the experimenter entered the room which is marked by a vertical line (No. I–VI). The bar below indicates the light/dark cycle (12:12 h). The light was turned off at 8:00 h and turned on at 20:00 h.

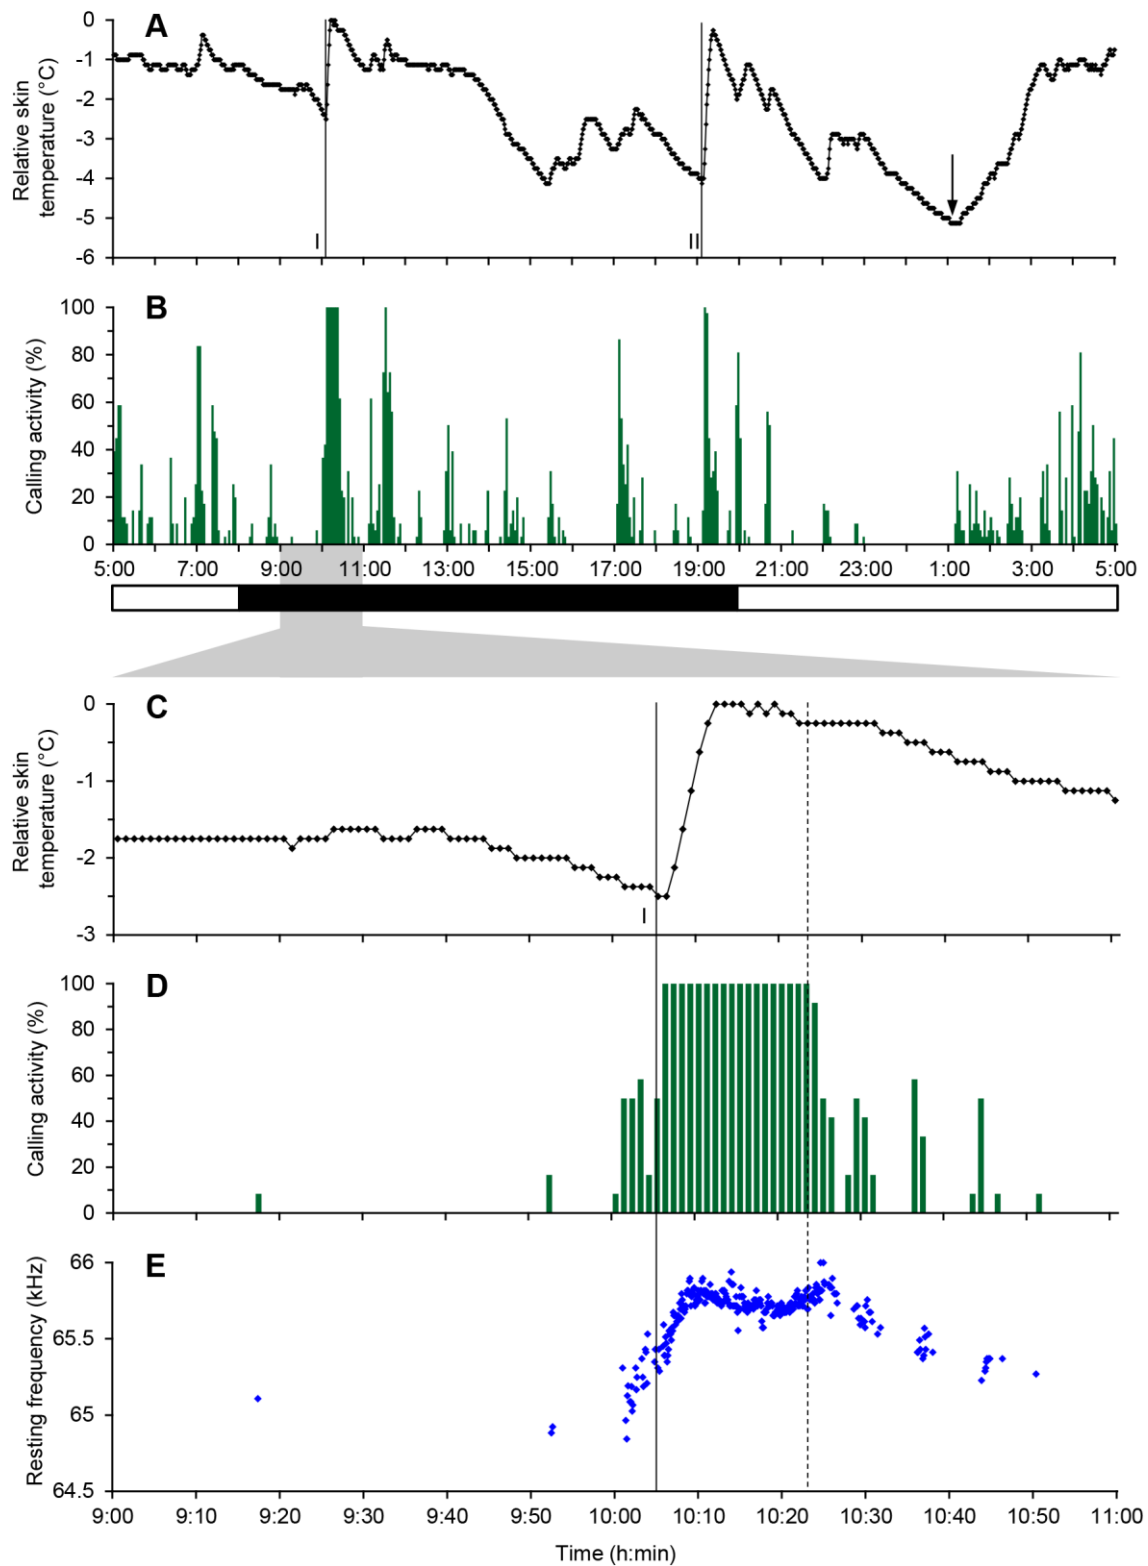

**Figure 2: Relative skin temperature (A and C), calling activity (B and D) and resting frequency (E) of one bat during a 24-hour period (A and B) and the 2-hour period (C, D, E) around the first activation (I) by the experimenter (black line). Skin temperature is shown relative to the daily maximum (32.1°C, 10:12 h). The minimum is marked with an arrow (A)**



and occurred at the end of the longest silent period. Calling activity in B was depicted in time bins of 3 min and in D of 1 min. Each frequency value in E represents the resting frequency in a five-second slot. The vertical lines in C-E mark the instant of time when the experimenter entered (solid line) and left (dotted line) the husbandry room.

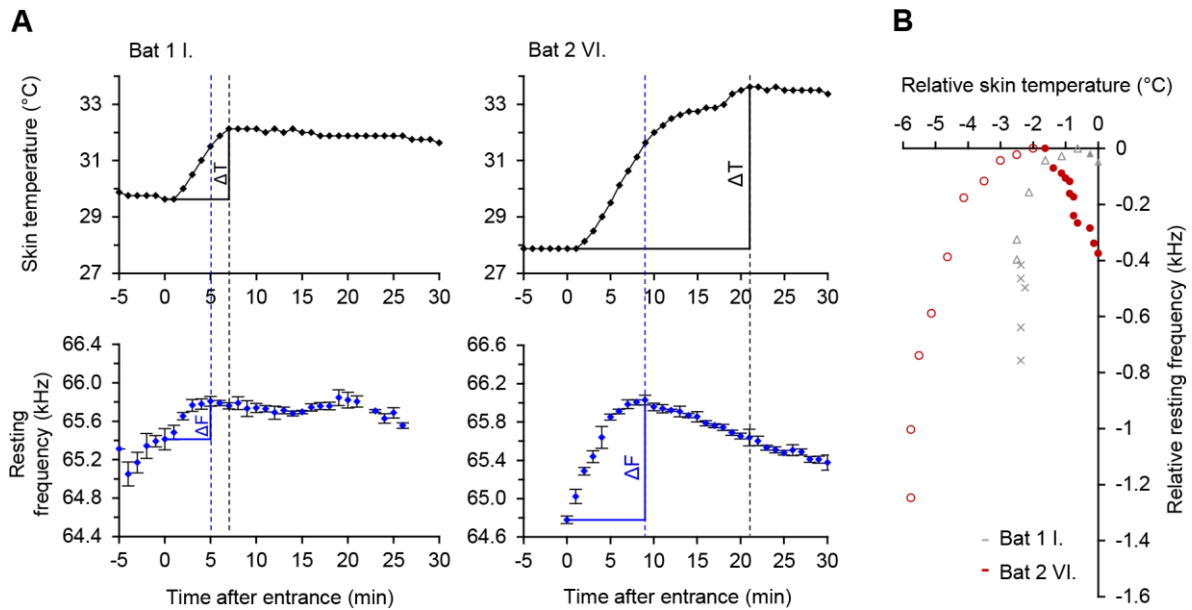

**Figure 3: Exemplary course of absolute skin temperature and resting frequency in the time periods five minutes before and 30 minutes after activation by the experimenter (No. I of Bat 1 and No. IV of Bat 2 see Fig. S1) (A) and correlation between the same data normalized to their maximum values (B).** Each dot corresponds to a one-minute period, the resting frequency was averaged (mean  $\pm$  SD). In (A) the dotted blue lines indicate the frequency maxima and the dotted black lines the skin temperature maxima. Solid lines mark the temperature and frequency rise from activation to the maximum. In (B) x symbols depict values five minutes before activation, empty symbols depict the values from activation until the frequency maximum is reached and filled symbols values to the temperature maximum after the frequency maximum was reached.

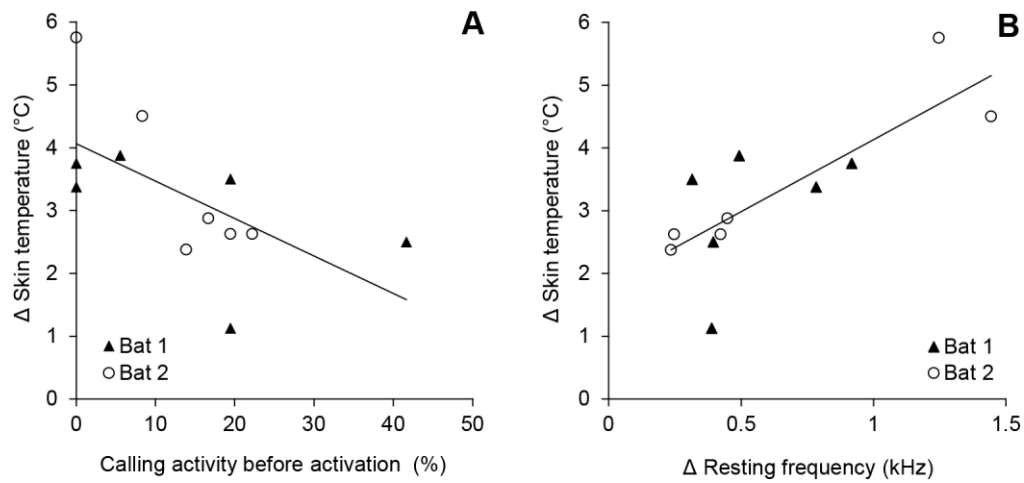

**Figure 4: Correlation between the increase in skin temperature and calling activity before activation (A) and the increase in resting frequency and increase in skin temperature (B) for all six activations in the two bats with regression lines.** The calling activity before activation (A) is based on the time span three minutes before the experimenter entered the room. (A) Spearman's  $\rho$  ( $N=12$ ) = -0.675,  $p = 0.0160$ , (B) Spearman's  $\rho$  ( $N=12$ ) = 0.79,  $p = 0.0022$ .

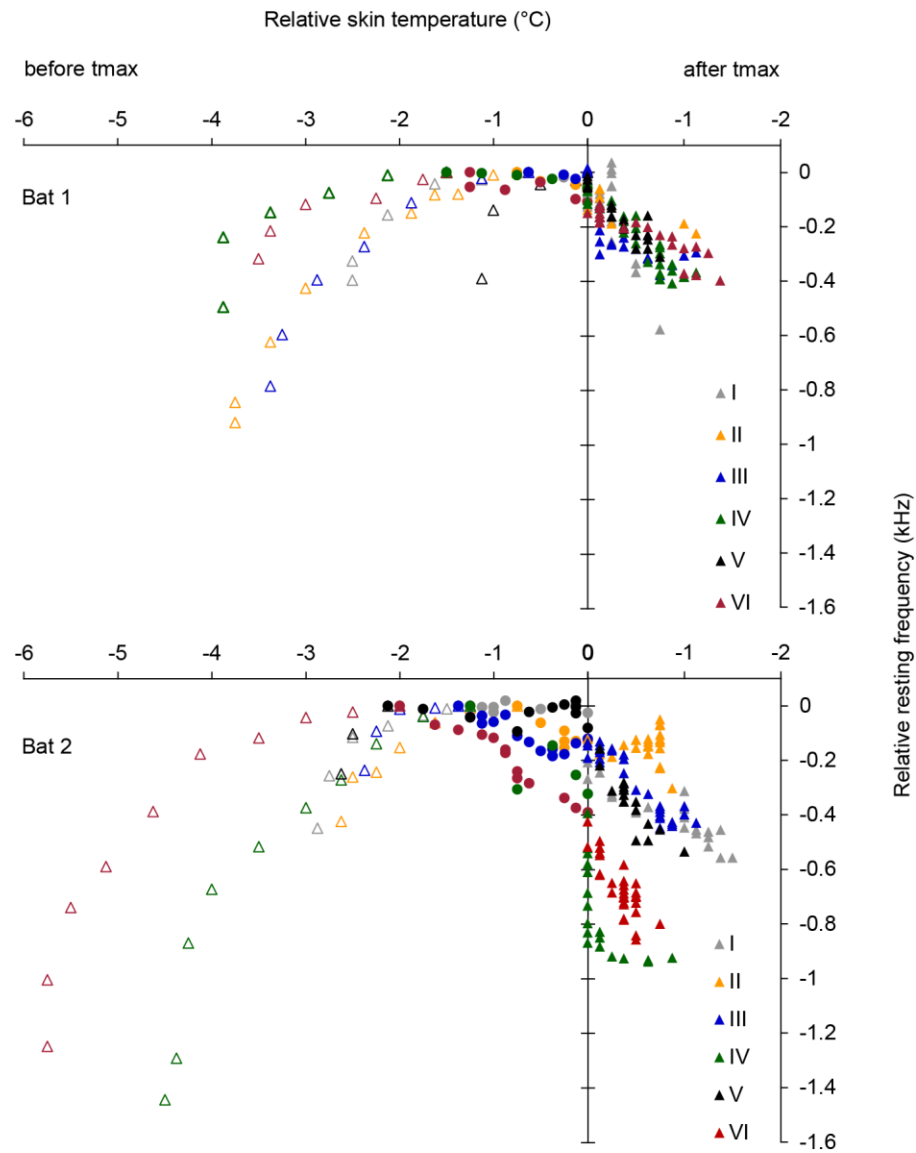

**Figure 5: Correlation between relative resting frequency and the relative skin temperature of Bat 1 and Bat 2 for all activations (I-VI).** Each curve presents data from activation to the frequency peak (empty symbols), between frequency and temperature peak (filled circles), and data after the temperature peak (filled triangles). The latter is given on a second negative X-axis to the right for better separation of data points. Each dot corresponds to the average value of a one-minute period. Per bat (n=6) Sign-test  $p=0.031$ .

**Table 1. Skin temperature and resting frequency for each bat at all activations by the experimenter (I-VI).** tmax: maximum skin temperature, fmax: maximum resting frequency.  $\Delta t$  and  $\Delta f$ : increase of skin temperature and frequency from the instance when the experimenter entered and the corresponding maximum,  $\Delta \text{time}(f_{\text{max}})$  and  $\Delta \text{time}(t_{\text{max}})$ : the duration to reach maximum values. t at fmax: the skin temperature at the frequency maximum. Calling activity was measured during a three-minute period directly before activation.

|              |     |                                      | Skin temperature |                 |                                 |                | Resting frequency |                  |                                 |
|--------------|-----|--------------------------------------|------------------|-----------------|---------------------------------|----------------|-------------------|------------------|---------------------------------|
|              |     | Calling activity before activation % | tmax (°C)        | $\Delta t$ (°C) | $\Delta \text{time}$ tmax (min) | t at fmax (°C) | fmax (kHz)        | $\Delta f$ (kHz) | $\Delta \text{time}$ fmax (min) |
| <b>Bat 1</b> | I   | 42                                   | 32.13            | 2.50            | 7                               | 31.50          | 65.81             | 0.40             | 5                               |
|              | II  | 0                                    | 31.88            | 3.75            | 14                              | 31.13          | 66.11             | 0.92             | 9                               |
|              | III | 0                                    | 32.00            | 3.38            | 10                              | 31.38          | 65.76             | 0.78             | 7                               |
|              | IV  | 6                                    | 34.63            | 3.88            | 9                               | 33.13          | 65.77             | 0.49             | 5                               |
|              | V   | 19                                   | 34.38            | 1.13            | 4                               | 34.38          | 65.22             | 0.39             | 4                               |
|              | VI  | 19                                   | 34.75            | 3.50            | 11                              | 33.25          | 65.87             | 0.32             | 5                               |
| <b>Bat 2</b> | I   | 17                                   | 32.88            | 2.88            | 13                              | 31.63          | 66.03             | 0.45             | 6                               |
|              | II  | 22                                   | 32.00            | 2.63            | 12                              | 31.25          | 66.35             | 0.42             | 6                               |
|              | III | 14                                   | 33.00            | 2.38            | 18                              | 31.63          | 65.83             | 0.24             | 4                               |
|              | IV  | 8                                    | 32.75            | 4.50            | 13                              | 31.50          | 66.19             | 1.44             | 9                               |
|              | V   | 19                                   | 32.50            | 2.63            | 12                              | 30.38          | 65.76             | 0.25             | 2                               |
|              | VI  | 0                                    | 33.63            | 5.75            | 21                              | 31.63          | 66.03             | 1.25             | 9                               |

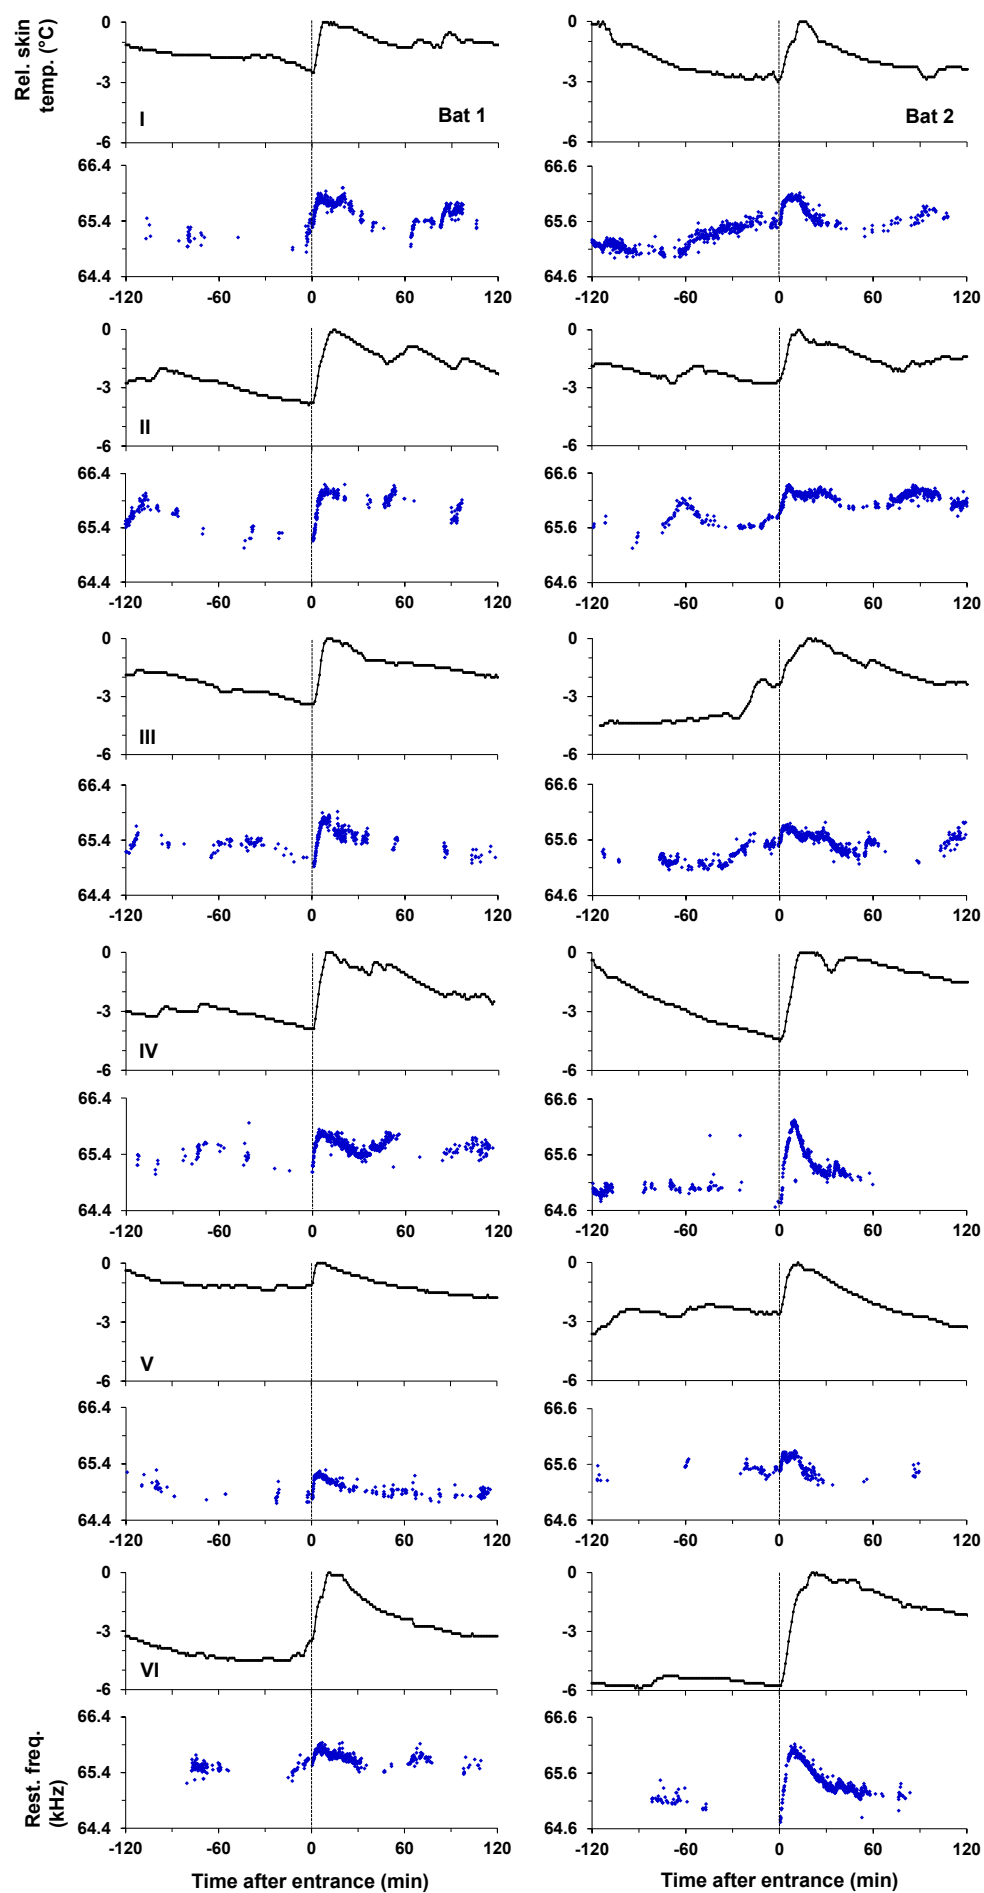

**Fig. S1. Relative skin temperature (Rel. skin temp.) and resting frequency (Rest. freq.) over a time course of two hours before and after activation by the experimenter.** For each bat, six activations are shown. Skin temperature is depicted relative to the maximum temperature reached after each activation. The vertical lines mark the instant of time when the experimenter entered the husbandry room. Each frequency value represents the resting frequency in a five-second slot.
